# Supplementary material for: Exploratory Study on Th1 Epitope-Induced Protective Immunity against Coxiella burnetii Infection
Source: PLoS One. 2014 Jan 30;9(1):e87206. doi: 10.1371/journal.pone.0087206 (PMC3907486; doi:10.1371/journal.pone.0087206)
Supplement: Table S1 — ELISPOT screening and MTT assay of the predicted epitope peptides. (DOC) [file pone.0087206.s001.doc]

**Table S1. ELISPOT screening and MTT assay of the predicted epitope peptides**

| **Peptide ID** | **Sequence** | **SIa-rAgsb** | **SIa-WCA**  **vaccinationc** | **CD4+ T cell proliferationd** |
| --- | --- | --- | --- | --- |
|
| Com142-56 | HYLVNHPEVLVEASQ | 9.17±2.08 | 24.83±1.53* | 1.34±0.06* |
| Com180-94 | KLFNDPASPVAGNPH | 2.78±0.94 | 3.67±0.58 | 1.1±0.03 |
| GroEL15-29 | AMSRGVEVLANAVKV | 1.36±0.17 |  |  |
| GroEL16-30 | MSRGVEVLANAVKVT | 1.34±0.31 |  |  |
| GroEL17-31 | SRGVEVLANAVKVTL | 1.82±0.43 |  |  |
| GroEL37-51 | NVVLDKSFGAPTITK | 1.64±0.18 |  |  |
| GroEL38-52 | VVLDKSFGAPTITKD | 1.85±0.67 |  |  |
| GroEL39-53 | VLDKSFGAPTITKDG | 1.84±0.51 |  |  |
| GroEL62-76 | LEDKFENMGAQMVKE | 2.35±0.39 | 3.33±1.41 | 1.09±0.06 |
| GroEL63-77 | EDKFENMGAQMVKEV | 2.02±1.07 |  |  |
| GroEL64-78 | DKFENMGAQMVKEVA | 1.57±0.06 |  |  |
| GroEL365-379 | LQERLAKLAGGVAVI | 2.50±0.80 | 3.67±1.15 | 1.19±0.12 |
| GroEL366-380 | QERLAKLAGGVAVIK | 1.96±0.29 |  |  |
| GroEL367-381 | ERLAKLAGGVAVIKV | 2.20±0.41 |  |  |
| GroEL368-382 | RLAKLAGGVAVIKVG | 1.60±0.40 |  |  |
| GroEL441-455 | EIARRAMAYPLSQIV | 1.60±0.36 |  |  |
| GroEL442-456 | IARRAMAYPLSQIVK | 2.20±0.52 |  |  |
| GroEL443-457 | ARRAMAYPLSQIVKN | 2.31±0.38 | 3.67±0.58 | 1.15±0.12 |
| GroEL452-466 | SQIVKNTGVQAAVVA | 1.18±0.11 |  |  |
| GroEL453-467 | QIVKNTGVQAAVVAD | 1.66±0.48 |  |  |
| GroEL471-485 | NHKDVNYGYNAATGE | 1.55±0.12 |  |  |
| GroEL472-486 | HKDVNYGYNAATGEY | 3.14±0.51 |  |  |
| GroEL473-487 | KDVNYGYNAATGEYG | 4.37±1.22 |  |  |
| GroEL474-488 | DVNYGYNAATGEYGD | 6.25±0.36 | 24.62±2.13* | 1.27±0.08* |
| GroEL498-512 | TKVTRTALQNAASIA | 1.43±0.33 |  |  |
| GroEL499-513 | KVTRTALQNAASIAG | 1.98±0.15 |  |  |
| GroEL500-514 | VTRTALQNAASIAGL | 1.84±0.62 |  |  |
| GroEL501-515 | TRTALQNAASIAGLM | 1.93±0.42 |  |  |
| Mip12-26 | GLLLGTTAHAATPLK | 1.90±0.21 |  |  |
| Mip13-27 | LLLGTTAHAATPLKT | 1.99±0.13 |  |  |
| Mip14-28 | LLGTTAHAATPLKTE | 1.77±0.14 |  |  |
| Mip128-142 | YKVLQAGQGQSPTLN | 2.04±0.09 | 1.13±0.75 | 1.13±0.09 |
| Mip129-143 | KVLQAGQGQSPTLND | 1.85±0.17 |  |  |
| Mip130-144 | VLQAGQGQSPTLNDE | 1.78±0.25 |  |  |
| Mip159-173 | FDSSYKRGQPATFPL | 2.10±0.13 | 12.41±0.71* | 1.32±0.01* |
| Mip161-175 | SSYKRGQPATFPLKS | 1.98±0.05 |  |  |
| Mip190-204 | GAIWEIYVPPQLAYG | 2.27±0.83 | 2.00±0.78 | 1.18±0.01 |
| Mip191-205 | AIWEIYVPPQLAYGE | 2.33±0.37 |  |  |
| Mip197-211 | VPPQLAYGEQGAPGV | 1.92±0.25 |  |  |
| Mip199-213 | PQLAYGEQGAPGVIG | 1.95±0.13 |  |  |
| Mip200-214 | QLAYGEQGAPGVIGP | 1.92±0.13 |  |  |
| Mip201-215 | LAYGEQGAPGVIGPN | 1.94±0.12 |  |  |
| Mip202-216 | AYGEQGAPGVIGPNE | 1.95±0.17 |  |  |
| P113-27 | ALCCLASAAFAGGPD | 2.14±0.34 | 2.50±1.52 | 1.29±0.08* |
| P115-29 | CCLASAAFAGGPDIP | 1.74±0.07 |  |  |
| P118-32 | ASAAFAGGPDIPMID | 1.95±0.20 |  |  |
| P141-55 | GFGYKSYTYDQVGTV | 1.69±0.20 |  |  |
| P144-58 | YKSYTYDQVGTVTVT | 1.77±0.35 |  |  |
| P146-60 | SYTYDQVGTVTVTTN | 1.56±0.71 |  |  |
| P160-74 | NGGTVLSVLHPVSAS | 1.77±0.05 |  |  |
| P162-76 | GTVLSVLHPVSASIT | 1.66±0.53 |  |  |
| P165-79 | LSVLHPVSASITQFG | 1.75±0.27 |  |  |
| P170-84 | PVSASITQFGPVGEL | 2.23±0.51 | 16.00±0.71* | 1.4±0.02* |
| P183-97 | ELGYTFASDWWIAGV | 0.59±0.17 |  |  |
| P186-100 | YTFASDWWIAGVKAQ | 1.43±0.08 |  |  |
| P189-103 | ASDWWIAGVKAQYQY | 1.55±0.47 |  |  |
| P1106-120 | VRSVHIMDAPLVGSN | 1.63±0.66 |  |  |
| P1108-122 | SVHIMDAPLVGSNYS | 1.60±0.11 |  |  |
| P1111-125 | IMDAPLVGSNYSYRT | 1.74±0.21 |  |  |
| P1130-344 | HLTAMLLAGIKVNEA | 1.08±0.18 |  |  |
| P1136-150 | LAGIKVNEANAVYLE | 1.60±0.10 |  |  |
| P1145-159 | NAVYLEAGYSTVWGK | 1.37±0.30 |  |  |
| P1157-171 | WGKTTLFGPGPVAVS | 1.54±0.12 |  |  |
| P1159-173 | KTTLFGPGPVAVSMK | 1.74±0.41 |  |  |
| P1161-175 | TLFGPGPVAVSMKNR | 1.62±0.25 |  |  |
| P1196-210 | DLSYDYALYRSKSNS | 2.49±0.53 | 1.52±1.38 | 1.18±0.01 |
| P1201-215 | YALYRSKSNSVTLSS | 1.58±0.32 |  |  |
| P1204-218 | YRSKSNSVTLSSATA | 2.07±0.05 | 1.63±1.08 | 1.25±0.08 |
| P1206-220 | SKSNSVTLSSATASA | 1.76±0.41 |  |  |
| P1209-223 | NSVTLSSATASAEGT | 1.58±0.04 |  |  |
| P1226-240 | GVSGTVQNPKRVAIN | 1.84±0.06 |  |  |
| P1235-249 | KRVAINGITATVNYL | 1.08±0.28 |  |  |
| OmpA24-38 | LAGGPDYVPAPSYAG | 1.77±0.75 |  |  |
| OmpA25-39 | AGGPDYVPAPSYAGV | 1.17±0.34 |  |  |
| OmpA26-40 | GGPDYVPAPSYAGVY | 2.49±0.65 | 1.62±0.78 | 1.09±0.05 |
| OmpA27-41 | GPDYVPAPSYAGVYL | 1.03±0.32 |  |  |
| OmpA146-160 | GKLGVAYTYNRANAG | 2.78±0.50 | 4.00±2.00* | 1.29±0.03* |
| OmpA147-161 | KLGVAYTYNRANAGL | 2.74±0.29 |  |  |
| OmpA148-162 | LGVAYTYNRANAGLP | 1.84±0.27 |  |  |
| OmpA149-163 | GVAYTYNRANAGLPT | 1.80±0.76 |  |  |
| OmpA151-165 | AYTYNRANAGLPTNK | 1.75±0.72 |  |  |
| OmpA152-166 | YTYNRANAGLPTNKI | 1.59±0.40 |  |  |
| OmpA171-185 | GSRSRFWNPLFAAGV | 0.98±0.43 |  |  |
| OmpA172-186 | SRSRFWNPLFAAGVQ | 1.00±0.60 |  |  |
| OmpA173-187 | RSRFWNPLFAAGVQY | 1.61±0.28 |  |  |
| OmpA197-211 | AQYTFVPGYRNASSK | 2.70±0.33 | 2.25±0.65 | 1.21±0.03 |
| OmpA198-212 | QYTFVPGYRNASSKR | 2.37±0.20 |  |  |
| OmpA207-221 | NASSKRFVAPVTHLF | 1.27±0.28 |  |  |
| OmpA208-222 | ASSKRFVAPVTHLFT | 1.59±0.31 |  |  |
| OmpH9-23 | ICLSVAMIWSVAAVA | 2.00±1.09 |  |  |
| OmpH10-24 | CLSVAMIWSVAAVAQ | 2.81±1.74 | 2.75±0.78 | 1.28±0.07* |
| OmpH11-25 | LSVAMIWSVAAVAQT | 2.71±0.81 |  |  |
| OmpH12-26 | SVAMIWSVAAVAQTV | 2.12±1.74 |  |  |
| OmpH13-27 | VAMIWSVAAVAQTVG | 2.82±0.76 | 4.00±1.73* | 1.4±0.04* |
| OmpH14-28 | AMIWSVAAVAQTVGL | 1.95±1.33 |  |  |
| OmpH15-29 | MIWSVAAVAQTVGLV | 1.14±0.08 |  |  |
| OmpH16-30 | IWSVAAVAQTVGLVD | 2.28±0.91 | 1.5±1.13 | 1.37±0.03* |
| OmpH17-31 | WSVAAVAQTVGLVDM | 1.82±0.39 |  |  |
| OmpH18-32 | SVAAVAQTVGLVDMR | 1.73±1.18 |  |  |
| OmpH28-42 | LVDMRQIFQTAPQIK | 1.88±0.28 |  |  |
| OmpH29-43 | VDMRQIFQTAPQIKD | 1.94±0.16 |  |  |
| OmpH30-44 | DMRQIFQTAPQIKDI | 1.90±0.56 |  |  |
| OmpH31-45 | MRQIFQTAPQIKDIN | 1.96±1.27 |  |  |
| OmpH119-133 | SDFMSKVNGAVKRVA | 1.83±0.25 |  |  |
| YbgF8-22 | IKTLCVSSALAALML | 1.85±0.14 |  |  |
| YbgF9-23 | KTLCVSSALAALMLS | 1.85±0.19 |  |  |
| YbgF16-30 | ALAALMLSAPLTWAD | 1.93±0.11 |  |  |
| YbgF31-45 | APVEDISAQPQPTKT | 1.83±0.25 |  |  |
| YbgF32-46 | PVEDISAQPQPTKTT | 1.2±0.11 |  |  |
| YbgF33-47 | VEDISAQPQPTKTTV | 1.13±0.26 |  |  |
| YbgF34-48 | EDISAQPQPTKTTVS | 2.07±0.14 | 2.08±1.67 | 1.19±0.07 |
| YbgF50-64 | SETPETAIPTAPVSL | 1.96±0.08 |  |  |
| YbgF51-65 | ETPETAIPTAPVSLP | 1.73±0.28 |  |  |
| YbgF53-67 | PETAIPTAPVSLPTT | 1.54±0.25 |  |  |
| YbgF56-70 | AIPTAPVSLPTTQTD | 2.10±0.04 | 1.50±0.65 | 1.16±0.03 |
| YbgF185-199 | LLTKKQYDKAQASFQ | 2.14±0.11 | 9.33±2.94* | 1.27±0.08* |
| YbgF186-200 | LTKKQYDKAQASFQN | 2.07±0.08 |  |  |
| YbgF187-201 | TKKQYDKAQASFQNY | 2.06±0.01 |  |  |
| YbgF274-288 | EIKKQHPESTAAQLA | 1.81±0.10 |  |  |
| YbgF275-289 | IKKQHPESTAAQLAN | 1.85±0.19 |  |  |
| YbgF277-291 | KQHPESTAAQLANIR | 1.87±0.20 |  |  |

aStimulation index (SI) was calculated using the number of number of spot forming cells (SFC) in peptide-stimulated cells divided by the number of SFC in non-stimulated cells; SI >2 was considered to be positive.

bCD4+T cells were isolated from 5 mice immunized with 20 μg of recombinant protein on day 10 post immunization. Peptides were added at 2μg/ml for 20 h, three independent experiments.

cCD4+T cells were isolated from 5 mice immunized with 20 μg of WCA of *C. burnetii* on day 10 post immunization. Peptides were added at 2μg/ml for 20 h, three independent experiments.

dCD4+T cells were isolated from 5 mice immunized with 20 μg of WCA of *C. burnetii* on day 10 post immunization. Peptides were added at 10 μg/ml for 48 h, three independent experiments. The proliferation level of CD4+T cells was calculated as the absorb value of T cells stimulated with each peptide divided by that of T cells stimulated with PBS.
